# Supplementary material for: The effectiveness of daily SMS reminders in pharmaceutical care of older adults on improving patients’ adherence to antihypertensive medication (SPPA): study protocol for a randomized controlled trial
Source: Springer Nature journal article supplement (doi:10.1186/s13063-017-2063-8), 2017-07-18

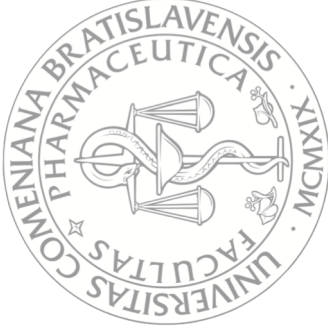

**Case Report Form Visit 1 - PART A**  
**Personal and Medication Information**

|                           |  |
|---------------------------|--|
| Patient Trial Code:       |  |
| Birth Certificate Number: |  |
| Address of Residency:     |  |
| Mobile Telephone Number:  |  |
| Date of Visit 1:          |  |

**Blood pressure-lowering drug(s):**

| No. | Drug Name<br>(Brand Name) | No. of<br>packages<br>dispensed | No. of pills<br>in one<br>package | Strength<br>(mg) | Dosage<br>Regimen<br>(e.g. 1-0-1) | Any pills<br>left at home<br>(YES/NO) | If YES,<br>how many<br>(No./PDK*) | Further information<br>(Daytime, before/with/after meal, etc.) |
|-----|---------------------------|---------------------------------|-----------------------------------|------------------|-----------------------------------|---------------------------------------|-----------------------------------|----------------------------------------------------------------|
| 1   |                           |                                 |                                   |                  |                                   |                                       |                                   |                                                                |
| 2   |                           |                                 |                                   |                  |                                   |                                       |                                   |                                                                |
| 3   |                           |                                 |                                   |                  |                                   |                                       |                                   |                                                                |
| 4   |                           |                                 |                                   |                  |                                   |                                       |                                   |                                                                |
| 5   |                           |                                 |                                   |                  |                                   |                                       |                                   |                                                                |
| 6   |                           |                                 |                                   |                  |                                   |                                       |                                   |                                                                |
| 7   |                           |                                 |                                   |                  |                                   |                                       |                                   |                                                                |
| 8   |                           |                                 |                                   |                  |                                   |                                       |                                   |                                                                |
| 9   |                           |                                 |                                   |                  |                                   |                                       |                                   |                                                                |
| 10  |                           |                                 |                                   |                  |                                   |                                       |                                   |                                                                |

**Date  
of scheduled Visit 2:**

\_\_\_\_. \_\_\_\_ . 2017  
 (at least 3 months after Visit 1)

**Preferred time  
for daily SMS reminders:**

\_\_\_\_: \_\_\_\_  
 (please, use 24 hour format)

\*PDK = Patient doesn't know → ! A phone call with the patient needs to be scheduled to find out the number of pills left at home !

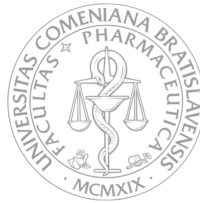

| <b>Case Report Form Visit 1 - PART B</b><br><b>Blood pressure measurement</b> |  |
|-------------------------------------------------------------------------------|--|
| Patient Trial Code:                                                           |  |
| Date of Visit 1:                                                              |  |

|                                                                                                                                               |                                           |
|-----------------------------------------------------------------------------------------------------------------------------------------------|-------------------------------------------|
| <b>1<sup>st</sup> BP measurement - LEFT ARM</b>                                                                                               |                                           |
| <i>systolic BP [mmHg]</i>                                                                                                                     | <input style="width: 100%;" type="text"/> |
| <i>diastolic BP [mmHg]</i>                                                                                                                    | <input style="width: 100%;" type="text"/> |
| <b>1<sup>st</sup> BP measurement - RIGHT ARM</b>                                                                                              |                                           |
| <i>systolic BP [mmHg]</i>                                                                                                                     | <input style="width: 100%;" type="text"/> |
| <i>diastolic BP [mmHg]</i>                                                                                                                    | <input style="width: 100%;" type="text"/> |
| <b>2<sup>nd</sup> BP measurement on the arm with higher BP</b>                                                                                |                                           |
| <i>systolic BP [mmHg]</i>                                                                                                                     | <input style="width: 100%;" type="text"/> |
| <i>diastolic BP [mmHg]</i>                                                                                                                    | <input style="width: 100%;" type="text"/> |
| <b><i>If there is a disparity in the 1<sup>st</sup> and 2<sup>nd</sup> measurement, perform a 3<sup>rd</sup> measurement on this arm:</i></b> |                                           |
| <b>3<sup>rd</sup> BP measurement on the arm with higher BP</b>                                                                                |                                           |
| <i>systolic BP [mmHg]</i>                                                                                                                     | <input style="width: 100%;" type="text"/> |
| <i>diastolic BP [mmHg]</i>                                                                                                                    | <input style="width: 100%;" type="text"/> |
| <b>Final BP (average of measurements from the arm with higher BP)</b>                                                                         |                                           |
| <i>systolic BP [mmHg]</i>                                                                                                                     | <input style="width: 100%;" type="text"/> |
| <i>diastolic BP [mmHg]</i>                                                                                                                    | <input style="width: 100%;" type="text"/> |

Appendix 3: Case Report Form Visit 1 - PART C

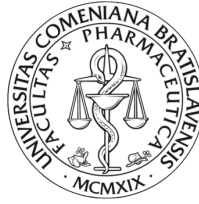

| <b>Case Report Form Visit 1 - PART C</b><br><b>Medication Adherence Measurement (MMAS-8)</b> |  |
|----------------------------------------------------------------------------------------------|--|
| Patient Trial Code:                                                                          |  |
| Date of Visit 1:                                                                             |  |

You indicated that you are taking medication(s) for your high blood pressure.

Individuals have identified several issues regarding their medication-taking behavior, and we are interested in your experiences.

**There is no right or wrong answer.**

Please answer each question based on your personal experience with your blood pressure-lowering medication(s)

**1. Do you sometimes forget to take your blood pressure-lowering medication(s)?**

YES      NO

**2. People sometimes miss taking their medication(s) for reasons other than forgetting. Thinking over the past two weeks, were there any days when you did not take your blood pressure-lowering medication(s)?**

YES      NO

**3. Have you ever cut back or stopped taking your medication(s) without telling your doctor, because you felt worse when you took it?**

YES      NO

**4. When you travel or leave home, do you sometimes forget to bring along your blood pressure-lowering medication(s)?**

YES      NO

**5. Did you take your blood pressure-lowering medication(s) yesterday?**

YES      NO

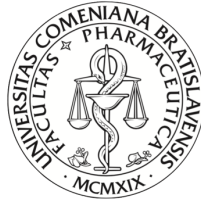

**6. When you feel like your blood pressure is under control, do you sometimes stop taking your medication(s)?**

YES NO

**7. Taking medication(s) every day is a real inconvenience for some people. Do you ever feel hassled about sticking to your blood pressure-lowering treatment plan?**

YES NO

**8. How often do you have difficulty remembering to take all your medication(s)?**

1. Never/Rarely
2. Once in a while
3. Sometimes
4. Usually
5. All the time

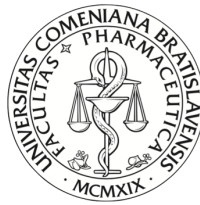

| <b>Case Report Form Visit 1 - PART D</b> |  |
|------------------------------------------|--|
| <b>Patient information form</b>          |  |
| Patient Trial Code:                      |  |
| Date of Visit 1:                         |  |

*Please mark with a cross the applicable answer (Your answer will remain anonymous)*

example :

*Should you have any questions, please do not hesitate to ask you trial pharmacist, he/she will gladly assist you.*

**1) Sex**

*Please, mark whether you are female or male.*

|               |  |
|---------------|--|
| <i>female</i> |  |
| <i>male</i>   |  |

**2) Education**

*Please, mark the highest level of education, you have achieved.*

|                                                  |  |
|--------------------------------------------------|--|
| <i>primary school</i>                            |  |
| <i>high school (grammar school)</i>              |  |
| <i>university undergraduate (BSc)</i>            |  |
| <i>university undergraduate (MSc)</i>            |  |
| <i>university postgraduate (PhD)</i>             |  |
| <i>I don't wish to disclose this information</i> |  |

**3) Monthly Income**

*Please, mark in which of the ranges your monthly income belongs.*

|                                                  |  |
|--------------------------------------------------|--|
| <i>&lt; 300 EUR</i>                              |  |
| <i>300-600 EUR</i>                               |  |
| <i>601-800 EUR</i>                               |  |
| <i>801-1000 EUR</i>                              |  |
| <i>&gt; 1000 EUR</i>                             |  |
| <i>I don't wish to disclose this information</i> |  |

**4) Marital Status**

*Please, mark the option best best describing your current marital status.*

|                                                       |  |
|-------------------------------------------------------|--|
| <i>single</i>                                         |  |
| <i>married or in a long-term partner relationship</i> |  |
| <i>divorced</i>                                       |  |
| <i>widowed</i>                                        |  |
| <i>I don't wish to disclose this information</i>      |  |

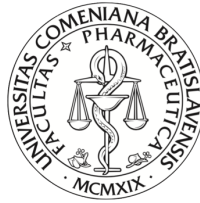

**5) Living Arrangement**

Please, mark the option best describing your current living arrangement.

- living with my partner/ husband (wife)
- living with my family or friends
- living in a nursing home
- living alone
- I don't wish to disclose this information

**6) Hypertension Duration**

Please, mark how many years before now your doctor prescribed you blood pressure-lowering medicines for the first time.

- < 5 years
- 5-10 years
- > 10 years

**7) Smoking Status**

Please, mark the option best describing your current relationship to smoking.

- non-smoker
- current smoker
- ex-smoker
- I don't wish to disclose this information

**8) Current number of daily medications**

Please, mark the number of drugs you are taking per day (please, consider all your current drugs).

- < 2
- 3-4
- 5-6
- 7-8
- > 8

**9) Concomitant diseases**

Has a doctor or nurse ever told you that you have (please, tick all that apply):

- high cholesterol
- diabetes
- atherosclerosis
- heart failure
- arthritis
- back pain
- asthma
- any other disease

*please, write down any other disease, your doctor or nurse has told you that you have:*



**10) Use of pillboxes**

Please, mark if you use pillboxes to help you remember to take your medicines in time.

|     |                          |
|-----|--------------------------|
| NO  | <input type="checkbox"/> |
| YES | <input type="checkbox"/> |

**11) Use of other reminder devices**

Please, mark if you use any other devices to help you remember to take your medicines in time?  
(e.g. alarm-clock, reminders from family members, etc.)

|     |                          |
|-----|--------------------------|
| NO  | <input type="checkbox"/> |
| YES | <input type="checkbox"/> |

if YES, what kind of reminder system:

**12) Purpose of using a mobile phone**

Please, mark the most relevant way you use your mobile phone.

|                                           |                          |
|-------------------------------------------|--------------------------|
| mostly personal                           | <input type="checkbox"/> |
| mostly professional                       | <input type="checkbox"/> |
| personal and professional                 | <input type="checkbox"/> |
| I don't wish to disclose this information | <input type="checkbox"/> |

**13) Receiving SMS**

Please, mark the approximate number of SMS you received last year

|                                           |                          |
|-------------------------------------------|--------------------------|
| one or more SMS a day                     | <input type="checkbox"/> |
| approximately one SMS a week              | <input type="checkbox"/> |
| approximately one SMS a month             | <input type="checkbox"/> |
| less than one SMS a month                 | <input type="checkbox"/> |
| I don't wish to disclose this information | <input type="checkbox"/> |

**14) Sending SMS**

Please, mark the approximate number of SMS you sent last year.

|                                           |                          |
|-------------------------------------------|--------------------------|
| one or more SMS a day                     | <input type="checkbox"/> |
| approximately one SMS a week              | <input type="checkbox"/> |
| approximately one SMS a month             | <input type="checkbox"/> |
| less than one SMS a month                 | <input type="checkbox"/> |
| I don't wish to disclose this information | <input type="checkbox"/> |

**Thank you very much for your precious time and your participation in the SPPA clinical trial !**

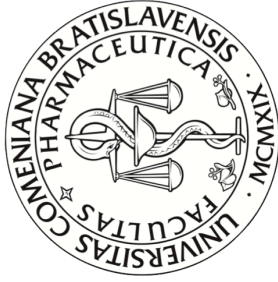

| <b>Case Report Form Visit 2 – PART A</b>                                 |  |
|--------------------------------------------------------------------------|--|
| <b>Pill Count</b>                                                        |  |
| Patient Trial Code:                                                      |  |
| Date of Visit 2:<br><i>(If patient attended Visit 2 in the pharmacy)</i> |  |
| Date of phone call:<br><i>(If pill count performed via phone call)</i>   |  |

| No. | Drug Name<br>(Brand name) | No. of<br>remaining pills in<br>the marked<br>package | pill count<br>performed<br>in pharmacy | pill count<br>performed<br>via phone call | Initials of<br>team member<br>performing pill<br>count/ phone call | Further comments |
|-----|---------------------------|-------------------------------------------------------|----------------------------------------|-------------------------------------------|--------------------------------------------------------------------|------------------|
| 1.  |                           |                                                       |                                        |                                           |                                                                    |                  |
| 2.  |                           |                                                       |                                        |                                           |                                                                    |                  |
| 3.  |                           |                                                       |                                        |                                           |                                                                    |                  |
| 4.  |                           |                                                       |                                        |                                           |                                                                    |                  |
| 5.  |                           |                                                       |                                        |                                           |                                                                    |                  |
| 6.  |                           |                                                       |                                        |                                           |                                                                    |                  |
| 7.  |                           |                                                       |                                        |                                           |                                                                    |                  |
| 8.  |                           |                                                       |                                        |                                           |                                                                    |                  |
| 9.  |                           |                                                       |                                        |                                           |                                                                    |                  |
| 10. |                           |                                                       |                                        |                                           |                                                                    |                  |

\*Please, make sure all evaluated drugs (marked packages) of each patient are listed. In case the patient forgot to bring the package(s) to the pharmacy, try to arrange a follow up phone call with the patient to count the pills during this phone call on the same day. If not possible, for this drug/ these drugs list only the reason why it was not possible to collect in the filed "Comments".



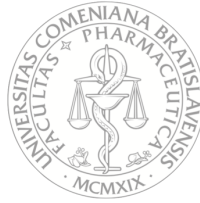

| <b>Case Report Form Visit 2 – PART B</b><br><b>Blood pressure measurement</b>                                                               |  |
|---------------------------------------------------------------------------------------------------------------------------------------------|--|
| Patient Trial Code:                                                                                                                         |  |
| Date of Visit 2:<br>(If patient did not attend Visit 2 at the pharmacy, strike-through the whole CRF Visit 2-PART B form from this patient) |  |

|                                                                                                                                               |  |
|-----------------------------------------------------------------------------------------------------------------------------------------------|--|
| <b>1<sup>st</sup> BP measurement – LEFT ARM</b>                                                                                               |  |
| systolic BP [mmHg]                                                                                                                            |  |
| diastolic BP [mmHg]                                                                                                                           |  |
| <b>1<sup>st</sup> BP measurement - RIGHT ARM</b>                                                                                              |  |
| systolic BP [mmHg]                                                                                                                            |  |
| diastolic BP [mmHg]                                                                                                                           |  |
| <b>2<sup>nd</sup> BP measurement on the arm with higher BP</b>                                                                                |  |
| systolic BP [mmHg]                                                                                                                            |  |
| diastolic BP [mmHg]                                                                                                                           |  |
| <b><i>If there is a disparity in the 1<sup>st</sup> and 2<sup>nd</sup> measurement, perform a 3<sup>rd</sup> measurement on this arm:</i></b> |  |
| <b>3<sup>rd</sup> BP measurement on the arm with higher BP</b>                                                                                |  |
| systolic BP [mmHg]                                                                                                                            |  |
| diastolic BP [mmHg]                                                                                                                           |  |
| <b>Final BP (average of measurements from the arm with higher BP)</b>                                                                         |  |
| systolic BP [mmHg]                                                                                                                            |  |
| diastolic BP [mmHg]                                                                                                                           |  |

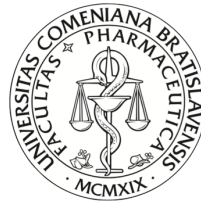

| <b>Case Report Form Visit 2 - PART C</b><br><b>Medication Adherence Measurement (MMAS-8)</b> |  |
|----------------------------------------------------------------------------------------------|--|
| Patient Trial Code:                                                                          |  |
| Date of Visit 2:<br><i>(If patient attended Visit 2 in the pharmacy)</i>                     |  |
| Date of phone call:<br><i>(If MMAS-8 was completed via phone call)</i>                       |  |

You indicated that you are taking medication(s) for your high blood pressure. Individuals have identified several issues regarding their medication-taking behavior, and we are interested in your experiences.

**There is no right or wrong answer.**

Please answer each question based on your personal experience with your blood pressure-lowering medication(s)

|                                                                                                                                                                                                                       |     |    |
|-----------------------------------------------------------------------------------------------------------------------------------------------------------------------------------------------------------------------|-----|----|
| <b>1. Do you sometimes forget to take your blood pressure-lowering medication(s)?</b>                                                                                                                                 | YES | NO |
| <b>2. People sometimes miss taking their medication(s) for reasons other than forgetting. Thinking over the past two weeks, were there any days when you did not take your blood pressure-lowering medication(s)?</b> | YES | NO |
| <b>3. Have you ever cut back or stopped taking your medication(s) without telling your doctor, because you felt worse when you took it?</b>                                                                           | YES | NO |
| <b>4. When you travel or leave home, do you sometimes forget to bring along your blood pressure-lowering medication(s)?</b>                                                                                           | YES | NO |
| <b>5. Did you take your blood pressure-lowering medication(s) yesterday?</b>                                                                                                                                          | YES | NO |

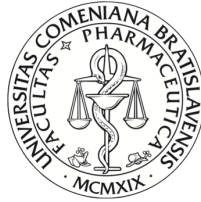

**6. When you feel like your blood pressure is under control, do you sometimes stop taking your medication(s)?**

YES NO

**7. Taking medication(s) every day is a real inconvenience for some people. Do you ever feel hassled about sticking to your blood pressure-lowering treatment plan?**

YES NO

**8. How often do you have difficulty remembering to take all your medication(s)?**

1. Never/Rarely
2. Once in a while
3. Sometimes
4. Usually
5. All the time

## Appendix 8: Satisfaction Questionnaire

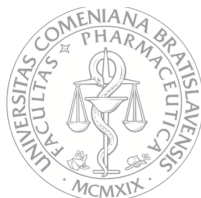

### Satisfaction Questionnaire SPPA trial

We would like to express our gratitude for your participation in our clinical trial!

This questionnaire addresses your experience with the additional pharmaceutical care service of SMS reminders helping you to take your blood pressure-lowering medicines on time. Your answers will guide us in improving the service for you and other patients in the future.

**Please, circle the answer that most appropriately describes your opinion**

#### 1. Do you feel SMS reminders helped you to remember to take your blood pressure-lowering drugs?

| 1            | 2             | 3                            | 4                | 5                    | 0            |
|--------------|---------------|------------------------------|------------------|----------------------|--------------|
| Fully agreed | Rather agreed | Neither agreed nor disagreed | Rather disagreed | Completely disagreed | I don't know |

#### 2. Do you feel SMS reminders have disrupted your medication intake?

| 1            | 2             | 3                            | 4                | 5                    | 0            |
|--------------|---------------|------------------------------|------------------|----------------------|--------------|
| Fully agreed | Rather agreed | Neither agreed nor disagreed | Rather disagreed | Completely disagreed | I don't know |

#### 3. Was the wording of the SMS reminders understandable?

| 1            | 2             | 3                            | 4                | 5                    | 0            |
|--------------|---------------|------------------------------|------------------|----------------------|--------------|
| Fully agreed | Rather agreed | Neither agreed nor disagreed | Rather disagreed | Completely disagreed | I don't know |

#### 4. Would you suggest the SMS reminders of drug intake to your friends or family members?

| 1            | 2             | 3                            | 4                | 5                    | 0            |
|--------------|---------------|------------------------------|------------------|----------------------|--------------|
| Fully agreed | Rather agreed | Neither agreed nor disagreed | Rather disagreed | Completely disagreed | I don't know |

#### 5. Was the frequency of the SMS reminders right?

| 1            | 2             | 3                            | 4                | 5                    | 0            |
|--------------|---------------|------------------------------|------------------|----------------------|--------------|
| Fully agreed | Rather agreed | Neither agreed nor disagreed | Rather disagreed | Completely disagreed | I don't know |

#### 6. Would you like to continue receiving SMS reminders of your blood pressure-lowering medication?

| 1            | 2             | 3                            | 4                | 5                    | 0            |
|--------------|---------------|------------------------------|------------------|----------------------|--------------|
| Fully agreed | Rather agreed | Neither agreed nor disagreed | Rather disagreed | Completely disagreed | I don't know |

**7. In general, are you satisfied with the additional pharmaceutical service of daily SMS reminders of your blood pressure-lowering medication?**

| 1            | 2             | 3                            | 4                | 5                    | 0            |
|--------------|---------------|------------------------------|------------------|----------------------|--------------|
| Fully agreed | Rather agreed | Neither agreed nor disagreed | Rather disagreed | Completely disagreed | I don't know |

**8. Would you like to regularly receive also other information related to your health in from of short informational SMS from your pharmacist (e.g. helpful advice about diet, wellbeing, exercise, medication etc.)?**

| 1            | 2             | 3                            | 4                | 5                    | 0            |
|--------------|---------------|------------------------------|------------------|----------------------|--------------|
| Fully agreed | Rather agreed | Neither agreed nor disagreed | Rather disagreed | Completely disagreed | I don't know |

**9. If you would like to continue receiving SMS reminders of your blood pressure-lowering medication, would you like to receive them:**

| 1          | 2           | 3            | 4                           | 0            |
|------------|-------------|--------------|-----------------------------|--------------|
| Once a day | Once a week | Once a month | Before each medication dose | I don't know |

**Below, you can leave your observations, comments and experiences with the SMS reminders of blood pressure-lowering drug intake:**

**Thank you very much for your precious time!**

***Your SPPA trial Research Team***

**Appendix 9: Sample Randomization and Allocation List**

| <b>Randomization and Allocation List</b> |             |
|------------------------------------------|-------------|
| <b>SPPA Trial</b>                        |             |
| Trial Centre (Pharmacy):                 |             |
| Address:                                 |             |
| Principal Investigator (Pharmacist):     |             |
| <i>Female</i>                            | <i>Male</i> |
| 1659                                     | 1203        |
| 1546                                     | 1837        |
| 1765                                     | 1199        |
| 1970                                     | 1954        |
| 1832                                     | 1922        |
| 1011                                     | 1286        |
| 1350                                     | 1577        |
| 1130                                     | 1620        |
| 1106                                     | 1788        |
| 1604                                     | 1250        |
| 1602                                     | 1928        |
| 1929                                     | 1420        |
| 1620                                     | 1471        |
| 1186                                     | 1834        |
| 1585                                     | 1310        |
| 1281                                     | 1529        |
| 1735                                     | 1896        |
| 1795                                     | 1782        |
| 1571                                     | 1383        |
| 1380                                     | 1893        |
| 1361                                     | 1727        |
| 1387                                     | 1469        |
| 1487                                     | 1534        |
| 1357                                     | 1809        |
| 1211                                     | 1034        |
| 1895                                     | 1143        |
| 1902                                     | 1644        |
| 1594                                     | 1209        |
| 1612                                     | 1528        |
| 1607                                     | 1273        |

**Intervention group**

**Control group**

## Appendix 10: Sample Randomization envelopes

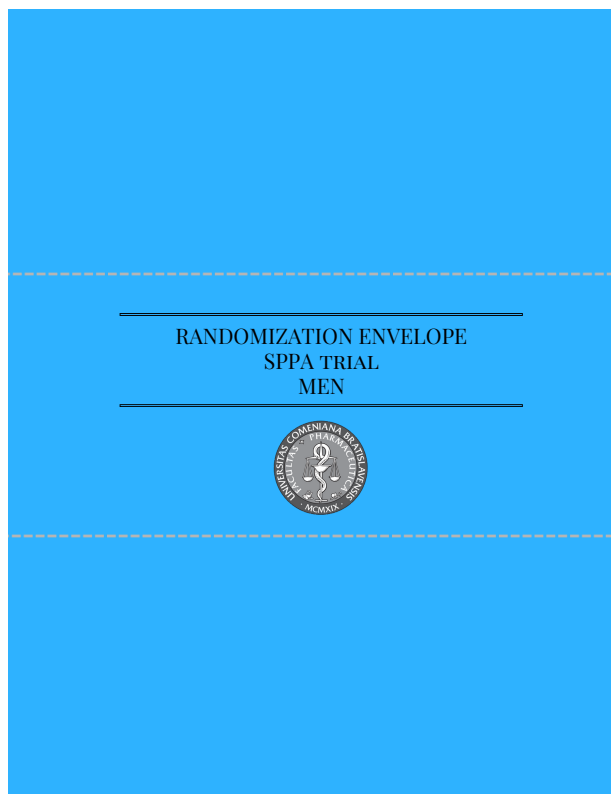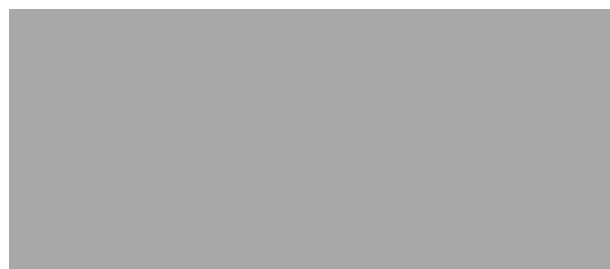

**PATIENT TRIAL CODE: 1203**

Participant's Name: \_\_\_\_\_

Mobile Phone Number: \_\_\_\_\_

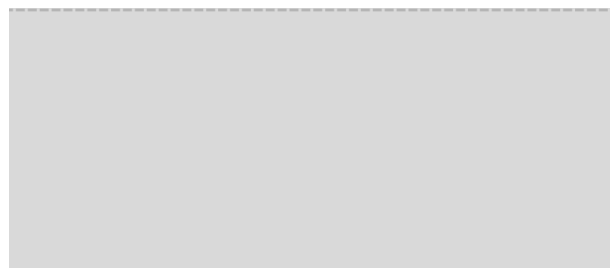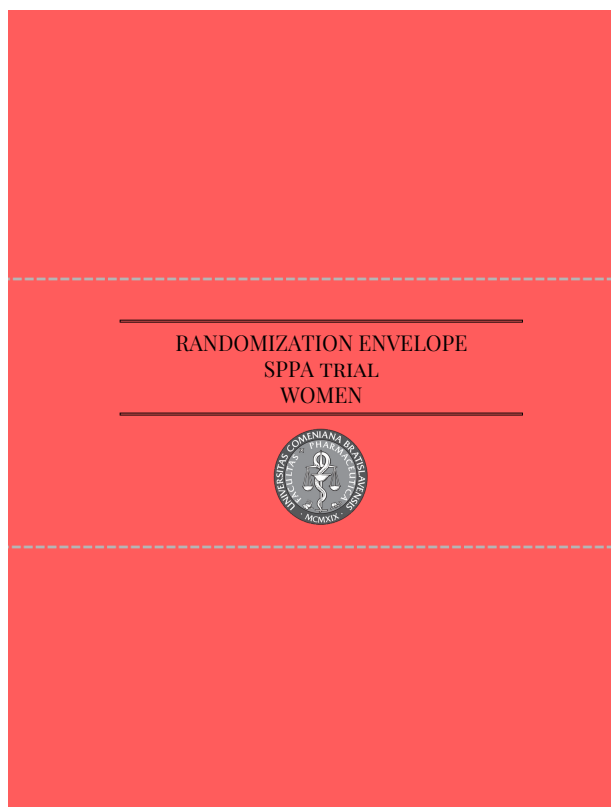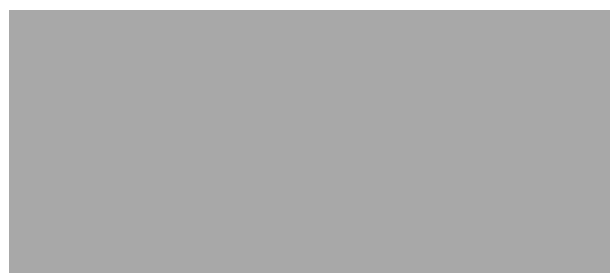

**PATIENT TRIAL CODE: 1659**

Participant's Name: \_\_\_\_\_

Mobile Phone Number: \_\_\_\_\_

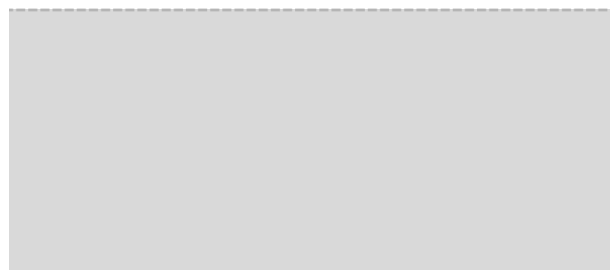

## Screening & Enrollment Log

### SPPA Trial

---

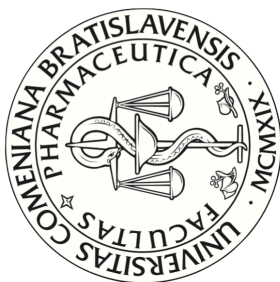

**Trial Centre (Pharmacy):** Pharmacy Name & Address [Code: XX]

**Principal Investigator (PI):** \_\_\_\_\_

| Patient Number | Enrolled<br>(YES or NO) | Patient Trial Code<br>(CODE or N/A) | Reason for no enrolling<br>(REASON or N/A)* | Date<br>of ICF<br>signature | Initials of<br>investigator |
|----------------|-------------------------|-------------------------------------|---------------------------------------------|-----------------------------|-----------------------------|
| XX-001         |                         |                                     |                                             |                             |                             |
| XX-002         |                         |                                     |                                             |                             |                             |
| XX-003         |                         |                                     |                                             |                             |                             |
| XX-004         |                         |                                     |                                             |                             |                             |
| XX-005         |                         |                                     |                                             |                             |                             |
| XX-006         |                         |                                     |                                             |                             |                             |
| XX-007         |                         |                                     |                                             |                             |                             |
| XX-008         |                         |                                     |                                             |                             |                             |
| XX-009         |                         |                                     |                                             |                             |                             |
| XX-010         |                         |                                     |                                             |                             |                             |

\* as reason can be also stated "patient refused to provide a reason"



# Adverse Events Report Form

Sites

**SPPA Trial**

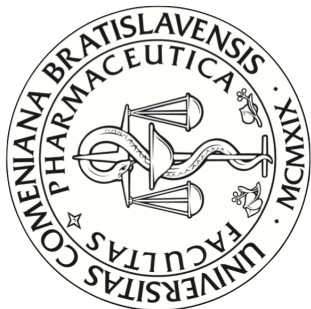

|                                     |                                    |
|-------------------------------------|------------------------------------|
| <b>Trial Centre (Pharmacy):</b>     | Pharmacy Name & Address [Code: XX] |
| <b>Principal Investigator (PI):</b> |                                    |

| Contact No. | Date of Contact | Patient Trial Code | Patient reported signal of an adverse event associated with an antihypertensive drug | Study member initials |
|-------------|-----------------|--------------------|--------------------------------------------------------------------------------------|-----------------------|
| 1.          |                 |                    |                                                                                      |                       |
| 2.          |                 |                    |                                                                                      |                       |
| 3.          |                 |                    |                                                                                      |                       |
| 4.          |                 |                    |                                                                                      |                       |
| 5.          |                 |                    |                                                                                      |                       |

# Adverse Events Report Form

Project Leader  
SPPA Trial

---

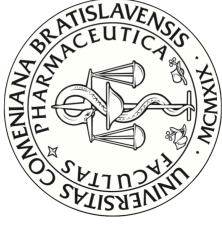

| Contact No. | Date of Contact | Patient Trial Code | Patient reported signal of an adverse event associated with an antihypertensive drug |
|-------------|-----------------|--------------------|--------------------------------------------------------------------------------------|
| 1.          |                 |                    |                                                                                      |
| 2.          |                 |                    |                                                                                      |
| 3.          |                 |                    |                                                                                      |
| 4.          |                 |                    |                                                                                      |
| 5.          |                 |                    |                                                                                      |

# Discontinuation Log

Sites

## SPPA Trial

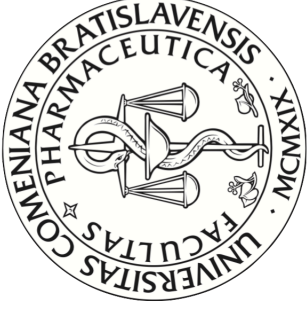

**Trial Centre (Pharmacy):** *Pharmacy Name and address [Code: XX]*

**Principal Investigator (PI):**

| No. | Patient Trial Code | Date of Discontinuation | Reason for Discontinuation in the trial<br>(ONLY if the patient wants to provide the reason) |
|-----|--------------------|-------------------------|----------------------------------------------------------------------------------------------|
| 1.  |                    |                         |                                                                                              |
| 2.  |                    |                         |                                                                                              |
| 3.  |                    |                         |                                                                                              |
| 4.  |                    |                         |                                                                                              |
| 5.  |                    |                         |                                                                                              |

**After each discontinuation, inform the Project Leader immediately (NECESSARILY on the date of discontinuation)!**

Appendix 15: Discontinuation Log - Project Leader

**Discontinuation Log**  
 Project Leader  
**SPPA Trial**

---

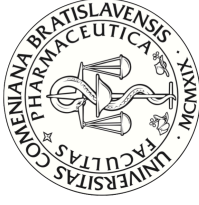

| No. | Patient Trial Code | Date of Discontinuation | Reason for Discontinuation in the trial<br>(ONLY if the patient wants to provide the reason) |
|-----|--------------------|-------------------------|----------------------------------------------------------------------------------------------|
| 1.  |                    |                         |                                                                                              |
| 2.  |                    |                         |                                                                                              |
| 3.  |                    |                         |                                                                                              |
| 4.  |                    |                         |                                                                                              |
| 5.  |                    |                         |                                                                                              |

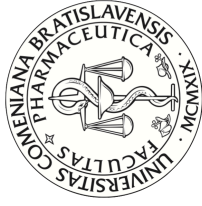

# Contact Report Form

Trial Pharmacists - Participants  
**SPPA Trial**

**Patient Trial Code:** \_\_\_\_\_

**1<sup>st</sup> phone call contact (only for patients with spare pills of antihypertensives at home)**

DATE: \_\_\_\_ . \_\_\_\_ . 2017

| blood pressure lowering drug | number of pills left at home |
|------------------------------|------------------------------|
| #1                           |                              |
| #2                           |                              |
| #3                           |                              |
| #4                           |                              |
| #5                           |                              |
| #6                           |                              |
| #7                           |                              |
| #8                           |                              |
| #9                           |                              |
| #10                          |                              |

**2<sup>nd</sup> phone call contact (all patients)**

DATE: \_\_\_\_ . \_\_\_\_ . 2017

Planned date of Visit 2: \_\_\_\_ . \_\_\_\_ . 2017

Will the patient attend Visit 2 as planned? YES NO

If NO: Date of re-scheduled Visit 2: \_\_\_\_ . \_\_\_\_ . 2017 (if not applicable strike through)

**Patient reminded to bring the marked drug packages:** YES NO

| If the patient is not at all able to attend Visit 2            |                                        |                                                  |                                                                        |
|----------------------------------------------------------------|----------------------------------------|--------------------------------------------------|------------------------------------------------------------------------|
| Reason<br>(ONLY if the patient is willing to provide a reason) | pill count performed during phone call | MMAS-8 questionnaire filed out during phone call | Satisfaction questionnaire (if applicable) filed out during phone call |
|                                                                | YES NO                                 | YES NO                                           | YES NO                                                                 |

## Contact Report Form

Participants - Sites

### SPPA Trial

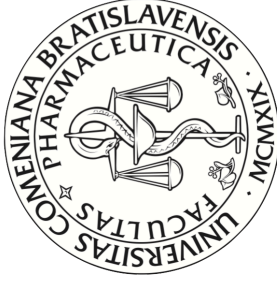

**Trial Centre (Pharmacy):** Pharmacy Name & Address [Code: XX]

**Principal Investigator (PI):** \_\_\_\_\_

| Contact No. | Date of Contact | Patient Trial Code | Issue description | Resolution description | Duration (from contact initiation to resolution) |
|-------------|-----------------|--------------------|-------------------|------------------------|--------------------------------------------------|
| 1.          |                 |                    |                   |                        |                                                  |
| 2.          |                 |                    |                   |                        |                                                  |
| 3.          |                 |                    |                   |                        |                                                  |
| 4.          |                 |                    |                   |                        |                                                  |
| 5.          |                 |                    |                   |                        |                                                  |

**Appendix 18: Contact Report Form - Participants - Project Leader**

**Contact Report Form**  
 Participants – Project Leader  
**SPPA Trial**

---

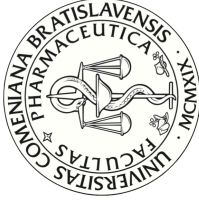

| Contact No. | Date of Contact | Patient Trial Code | Issue description | Resolution description | Duration (from contact initiation to resolution) |
|-------------|-----------------|--------------------|-------------------|------------------------|--------------------------------------------------|
| 1.          |                 |                    |                   |                        |                                                  |
| 2.          |                 |                    |                   |                        |                                                  |
| 3.          |                 |                    |                   |                        |                                                  |
| 4.          |                 |                    |                   |                        |                                                  |
| 5.          |                 |                    |                   |                        |                                                  |

## Authorization List

### SPPA Trial

---

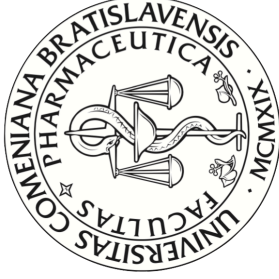

**Trial Centre (Pharmacy):** Pharmacy Name & Address [Code: XX]

**Principal Investigator (PI):** \_\_\_\_\_

| Name | Trial Function | Signature | Initials | Authorized Procedures (No.) | Start Date | PI Signature/Initials | End Date | PI Signature/Initials |
|------|----------------|-----------|----------|-----------------------------|------------|-----------------------|----------|-----------------------|
|      |                |           |          |                             |            |                       |          |                       |
|      |                |           |          |                             |            |                       |          |                       |
|      |                |           |          |                             |            |                       |          |                       |
|      |                |           |          |                             |            |                       |          |                       |
|      |                |           |          |                             |            |                       |          |                       |
|      |                |           |          |                             |            |                       |          |                       |
|      |                |           |          |                             |            |                       |          |                       |
|      |                |           |          |                             |            |                       |          |                       |
|      |                |           |          |                             |            |                       |          |                       |
|      |                |           |          |                             |            |                       |          |                       |

*Legend (No.):*



## Training Log SPPA Trial

---

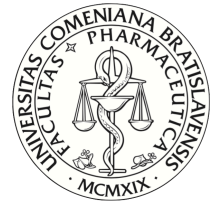

|                                     |       |
|-------------------------------------|-------|
| <b>Trial Centre (Pharmacy):</b>     | _____ |
| <b>Principal Investigator (PI):</b> | _____ |
| <b>Date of Training:</b>            | _____ |

|                           |       |
|---------------------------|-------|
| <b>Training Topic(s):</b> | _____ |
| <b>Training Details:</b>  | _____ |
|                           | _____ |
|                           | _____ |
|                           | _____ |

| <b>Trainee(s):</b> |           |
|--------------------|-----------|
| Name               | Signature |
|                    |           |
|                    |           |
|                    |           |
|                    |           |
|                    |           |

**Confirmation by Trainer:**

\_\_\_\_\_

*Name*                                      *Date*                                      *Signature*

## Appendix 21: SPPA Scheme for Blood Pressure Measurement

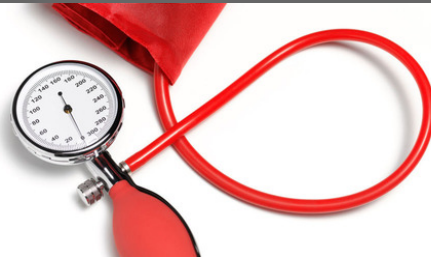

### SPPA Scheme for Blood Pressure Measurement (BPM)

#### Before BPM

- 1. Let the patient rest in a sitting position for 3-5 minutes.**  
(the patient should have uncrossed legs and be seated comfortably in a chair with his/her back and arm supported)
- 2. Choose the appropriate cuff that fits patient's arm properly.**  
(The cuff bladder length should cover at least 80% of patient's arm circumference)
- 3. Position the cuff at the heart level of the patient**  
(approximately 2-3 cm above the elbow (*antecubital fossa*) with the marker on the cuff in the middle of patient's inner arm)

#### BPM

Neither the pharmacist nor the patient should talk during the BP measurement

- 1. Measure BP on both arms once to detect differences<sup>1</sup>.**
- 2. Wait 1-2 minutes and repeat the BP measurement on the arm with the higher BP**
- 3. (Perform an additional measurement if there is a disparity between the first and the second measurement)**
- 4. Note the blood pressure values in the Case Report Form**

<sup>1</sup> approximately 20% of individuals may have a difference >10 mm Hg

**Adopted according:**

MANCIA, G., R. FAGARD, K. NARKIEWICZ, J. REDÁN, et al. 2013 Practice guidelines for the management of arterial hypertension of the European Society of Hypertension (ESH) and the European Society of Cardiology (ESC): ESH/ESC Task Force for the Management of Arterial Hypertension. *J Hypertens*, 2013, 31(10), 1925-1938.  
PICKERING, T. G., J. E. HALL, L. J. APPEL, B. E. FALKNER, et al. Recommendations for blood pressure measurement in humans and experimental animals: part 1: blood pressure measurement in humans: a statement for professionals from the Subcommittee of Professional and Public Education of the American Heart Association Council on High Blood Pressure Research. *Circulation*, Feb 8 2005, 111(5), 697-716.

## Appendix 22: SPPA Trial Patient Card

Front side:

 **Patient Card**   
**SPPA trial**

This patient is participating in a clinical trial investigating patients' adherence to blood pressure-lowering drugs.  
The trial does not involve any investigation products or investigational drugs.

---

**Trial Code:**  
**Trial Sponsor:** Faculty of Pharmacy, Comenius University in Bratislava  
**Trial Centre:**

**Trial duration:** \_\_\_\_\_

**Date of the scheduled follow-up visit:** \_\_\_\_\_

**Patient Trial Code:** \_\_\_\_\_

Back side:

Please, feel welcome to contact **PharmDr. Zuzana Haramiová**, who is the Project Leader of the clinical trial, in case you have any questions regarding the clinical trial.

Please, also contact her in the following cases:

- you have lost your mobile telephone
- you have changed your mobile telephone number
- you have been hospitalised
- your doctor has changed your blood pressure-lowering medication
- you won't be able to participate in the clinical trial
- you no longer wish to participate in the clinical trial and would like to withdraw your consent

**Project Leader:** PharmDr. Zuzana Haramiová  
**Telephone Number:**

You can call **anytime you feel need for it**.  
The phone call will be of **no cost to you**.

**Appendix 23: SPPA Trial Medication Label**

**SPPA trial**

*Trial Centre (Pharmacy), Address of the Trial Centre (Pharmacy)*

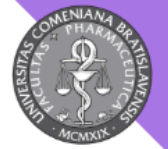

Supplement: MOESM3 [file 13310110]
